# Supplementary material for: Glycochenodeoxycholate Affects Iron Homeostasis via Up-Regulating Hepcidin Expression
Source: MDPI journal article supplement (doi:10.3390/nu14153176), 2022-08-02
Supplement: s1 [file s1]

**Table S1.** Primers used for RT-qPCR analysis.

| Samples    | Gene           | Forward primer             | Reverse primer                |
|------------|----------------|----------------------------|-------------------------------|
| HepG2 cell | HAMP           | CTGACCAGTGGCTCTGTTTTTC     | GAAGTGGGTGTCTCGCCTC           |
|            | IL-6           | TTCCACGAAGTGACAGTGTGA      | GCACGGTAGAAAAGGAAGGGT         |
|            | BMP2           | AATGCAAGCAGGTGGGAAAG       | GCTGTGTTTCATCTTGGTGCA         |
|            | BMP4           | AGCAGCCAAACTATGGGCTA       | TGGTTGAGTTGAGGTGGTCA          |
|            | BMP6           | AAGGCTGGCTGGAATTTGACATCACG | GGTAGAGCGATTACGACTCTGTTGTC    |
|            | ALK2           | GCCTGGAGCATTGGTAAGC        | CTGCCCACAGTCCTTCAAG           |
|            | ALK3           | GCTATGATCATCTTCTCCAGCTGC   | TGGCAATAGTTCGCTGAACCAA        |
|            | ActRIIA        | GCCAGCATCCATCTCTTGAAGAC    | GATAACCTGGCTTCTGCGTCGT        |
|            | ActRIIB        | CGCTTTGGCTGTGTCTGGAAGG     | CAGGTTCTCGTGCTTCATGCCA        |
|            | HJV            | GCTAACCCTGGGAACCATGTG      | CCCAACACAGAGCTGCAGGT          |
|            | TGR5           | CTGGCCCTGGCAAGCCTCAT       | CTGCCATGTAGCGCTCCCCGT         |
|            | FXR            | GCAGCCTGAAGAGTGGTACTCTC    | CATTCAGCCAACATTCCCATCTC       |
|            | $\beta$ -Actin | AACTGGTCTCAAGTCAGTGTACAGG  | TCCCCCAACTTGAGATGTATGAAG      |
| Mice       | DMT1           | GTGATCCTGACCCGGTCTATCG     | TGAGGATGGGTATGAGAGCAAAGG      |
|            | TNF- $\alpha$  | CACAAGATGCTGGGACAGTGA      | TCCTTGATGGTGGTGCATGA          |
|            | IL-6           | CTGCAAGAGACTTCCATCCAGTT    | AGGGAAGGCCGTGGTTGT            |
|            | TFR1           | AACTTACCCATGACGTTGATTGAACC | ACAGCCACTGTAGACTTA-GACCCATATC |
|            | $\beta$ -Actin | GGCTGTATTCCCCCTCCATCG      | CCAGTTGGTAACAATGCCATGT        |
|            | HAMP           | CTGCCTGTCTCCTGCTTCTC       | AGATGCAGATGGGGAAGTTG          |

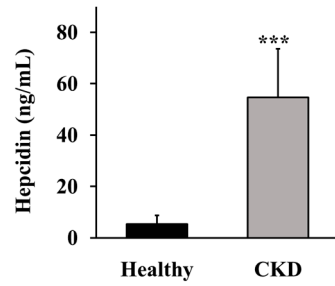

**Figure S1.** Concentration of serum hepcidin in 10 healthy subjects and 20 CKD patients. Values were shown as means  $\pm$  SD. \*\*\*,  $p < 0.001$ , group of CKD patients vs. group of healthy subjects.

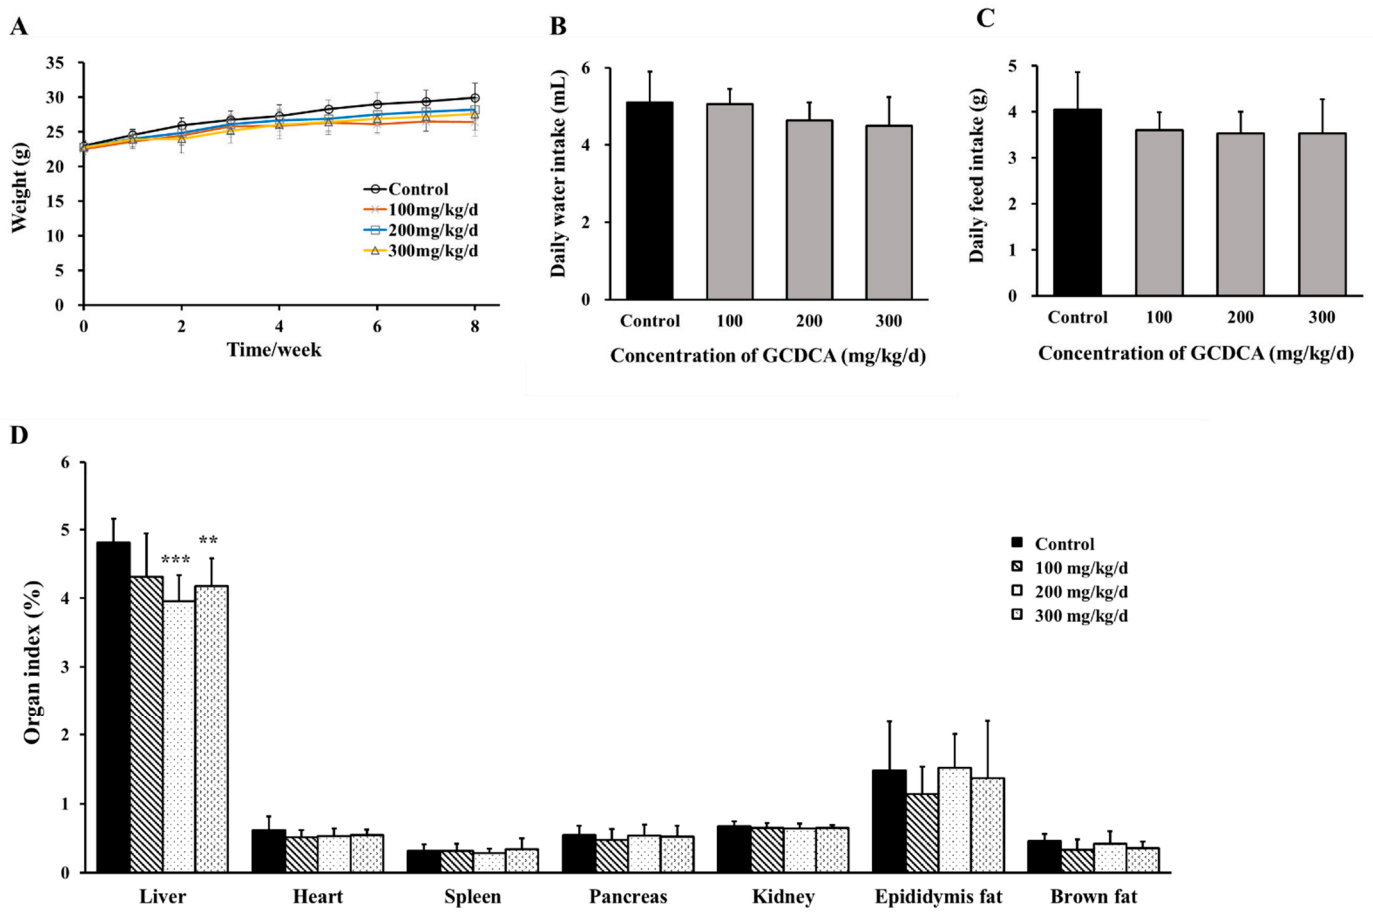

**Figure S2.** Effect of GCDCA administration on body weight and organ index in mice. (A) Effect of GCDCA administration on body weight of mice at treatment concentrations of 0, 100, 200 and 300 mg/kg/d. (B) Effect of GCDCA administration on daily water intake of last three days before the end of experiment. (C) Effect of GCDCA administration on daily feed intake of last three days before the end of experiment. (D) Effect of GCDCA administration on organ index of mice at concentrations of 0, 100 mg/kg/d, 200 mg/kg/d and 300 mg/kg/d. \*\*,  $p < 0.01$ , GCDCA treatment group vs. control group. \*\*\*,  $p < 0.001$ .
